# Supplementary material for: Fucosyltransferase 4-derived Peptide Bioconjugates on Carbon Nanotubes Enhance Antitumor Immunity in an Ovarian Cancer Mouse Model
Source: Research Square preprint supplement (doi:10.21203/rs.3.rs-6797764/v1), 2025-07-14
Supplement: Supplementary file 1 [file 52ac628005c654485980d222.docx]

**Supplementary material.**


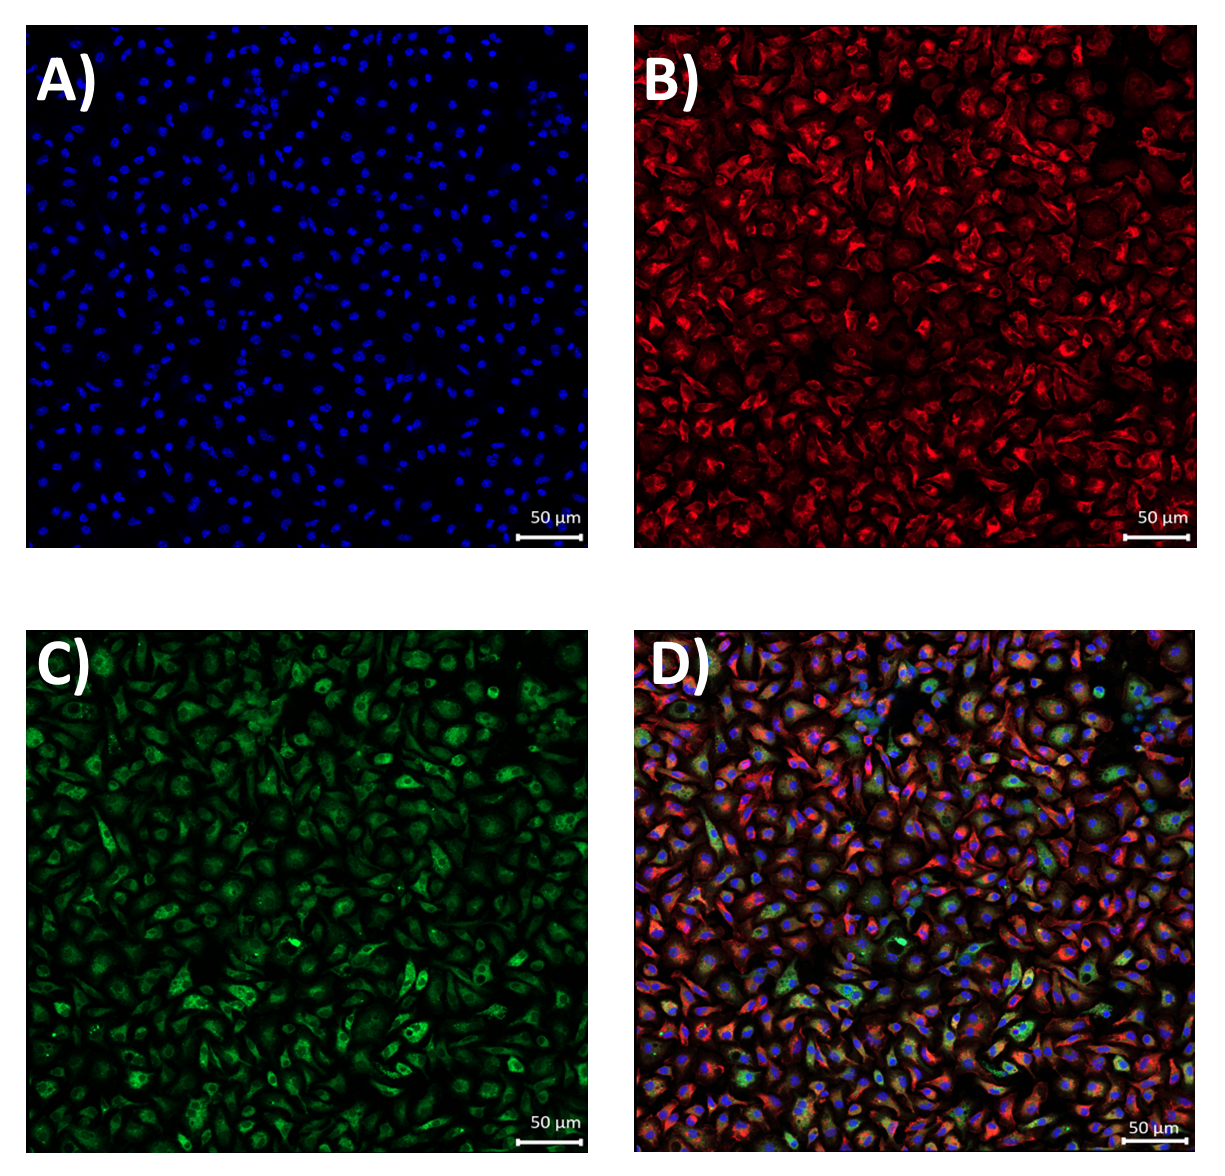


**Supplementary Figure 1.** Tiles scan 10X. ID8DVLuc cells identified in ascites by GFP expression. **A)** Blue, nuclei. **B)** Red, FUT4-AF647; **C)** Green, ID8DVLuc-GFP. **D)** Merge. All the cells displayed were both GFP- and FUT4-positive.

**
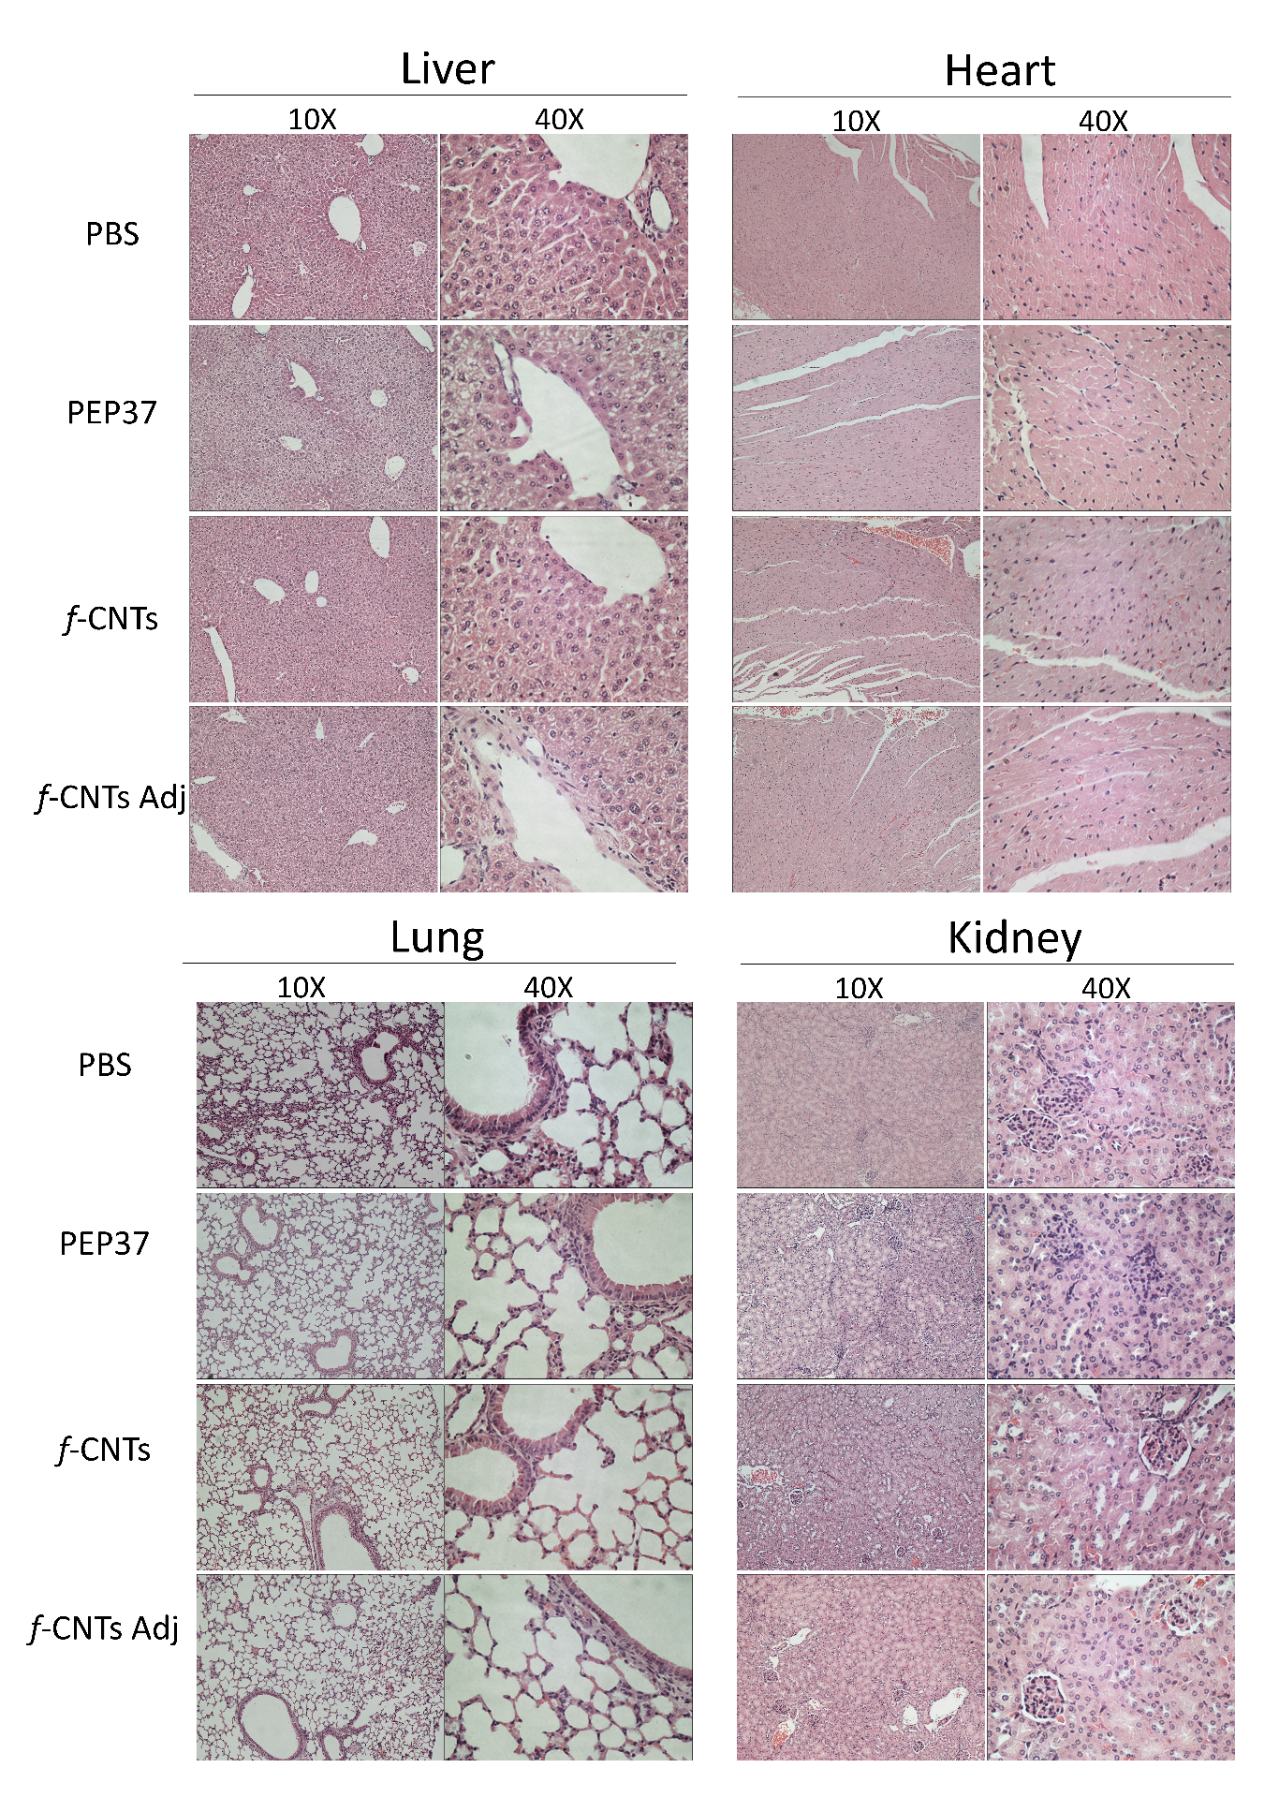
Supplementary Figure 2.** Histological analysis of immunized mice. Representative images of each group are shown at 10X and 40X magnification. The samples were stained with H&E.


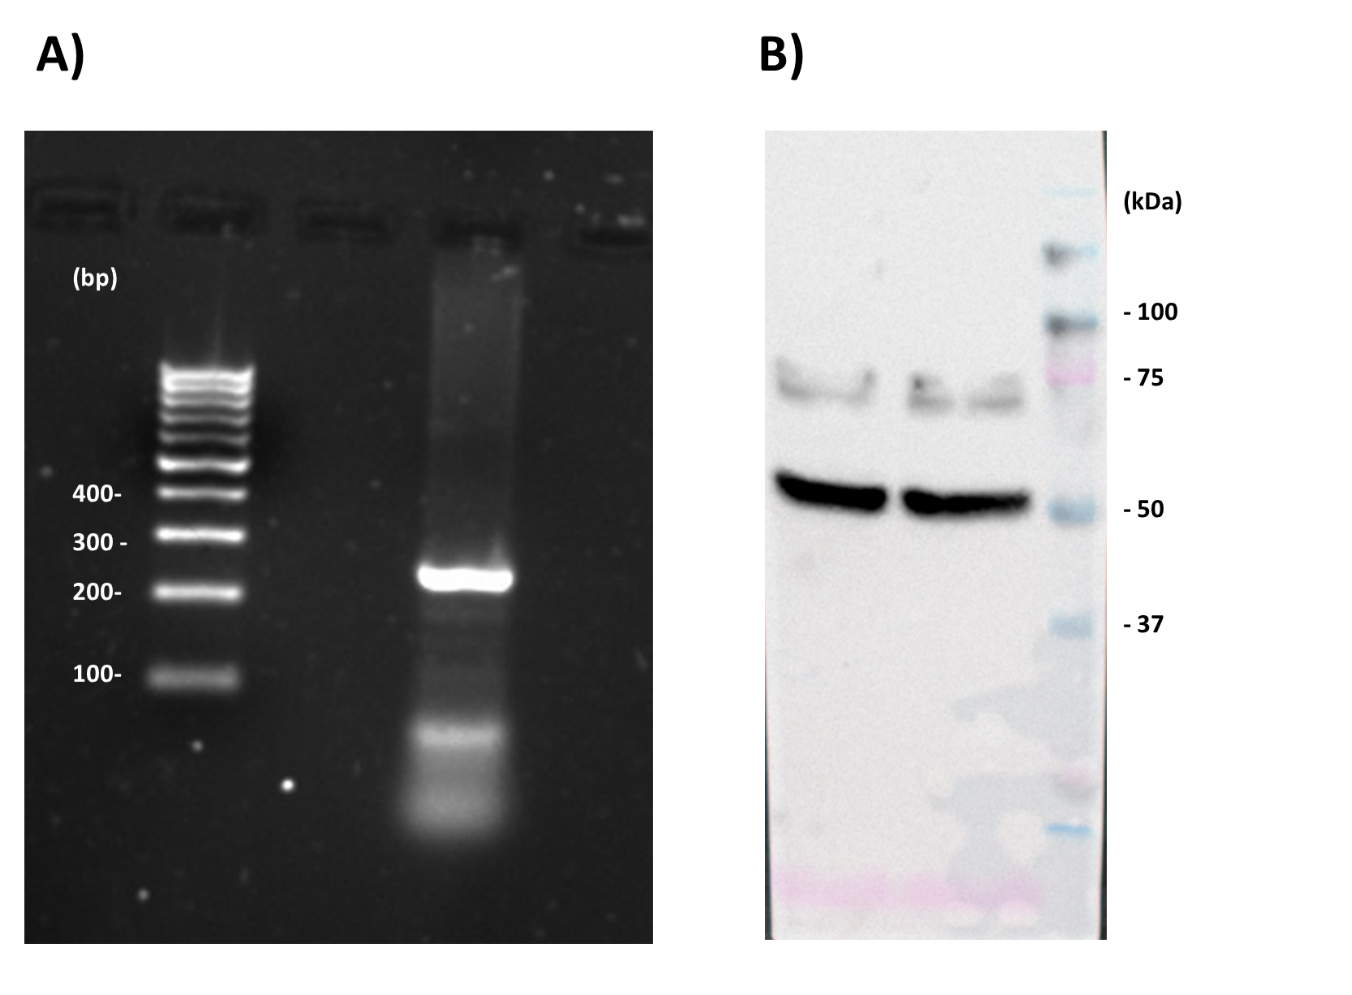
**Supplementary Figure 3. Complete and not edited gel and membranes.** A) RT‒PCR fw: **GGATGAACTTCGAATCGCCC**, rv: **AGCTGGTGGTAGTAACGGAC**. B) Western blot. Anti-FUT4 rabbit pAb (ABclonal. The catalog number was A16320 (dilution: 1:1000), and the Western blot detection reagent used was HRP (1:400).


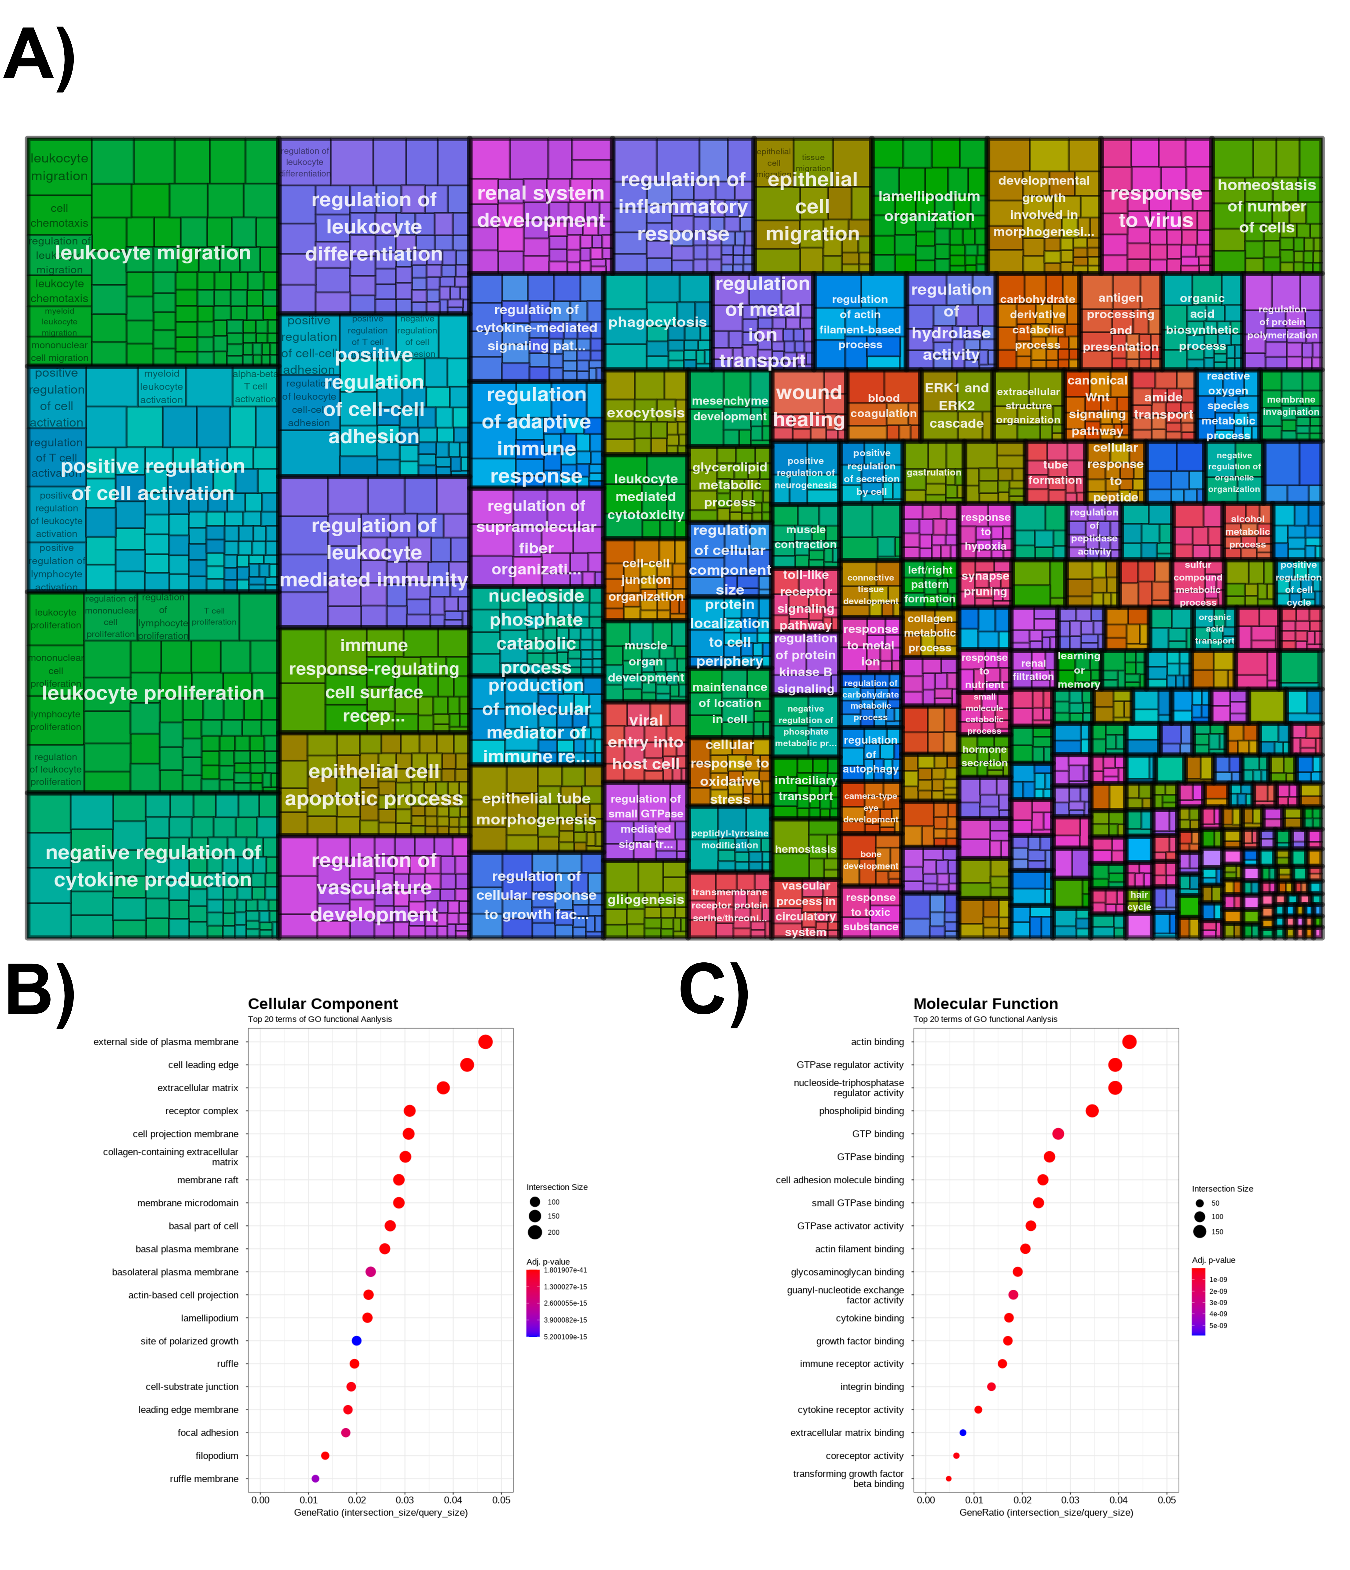


**Supplementary Figure 4. Gene ontology analysis of ascitic fluid cells from *f*-CNT-immunized mice.** **A)** Treemap plot. Treemaps are space-filling visualizations of hierarchical structures. The terms are grouped (colored) based on their parent, and the space used by the term is proportional to the score. **B)** Top 20 terms from the GO functional analysis of the CC category. **C)** Top 20 terms of GO functional analysis from the molecular function category.


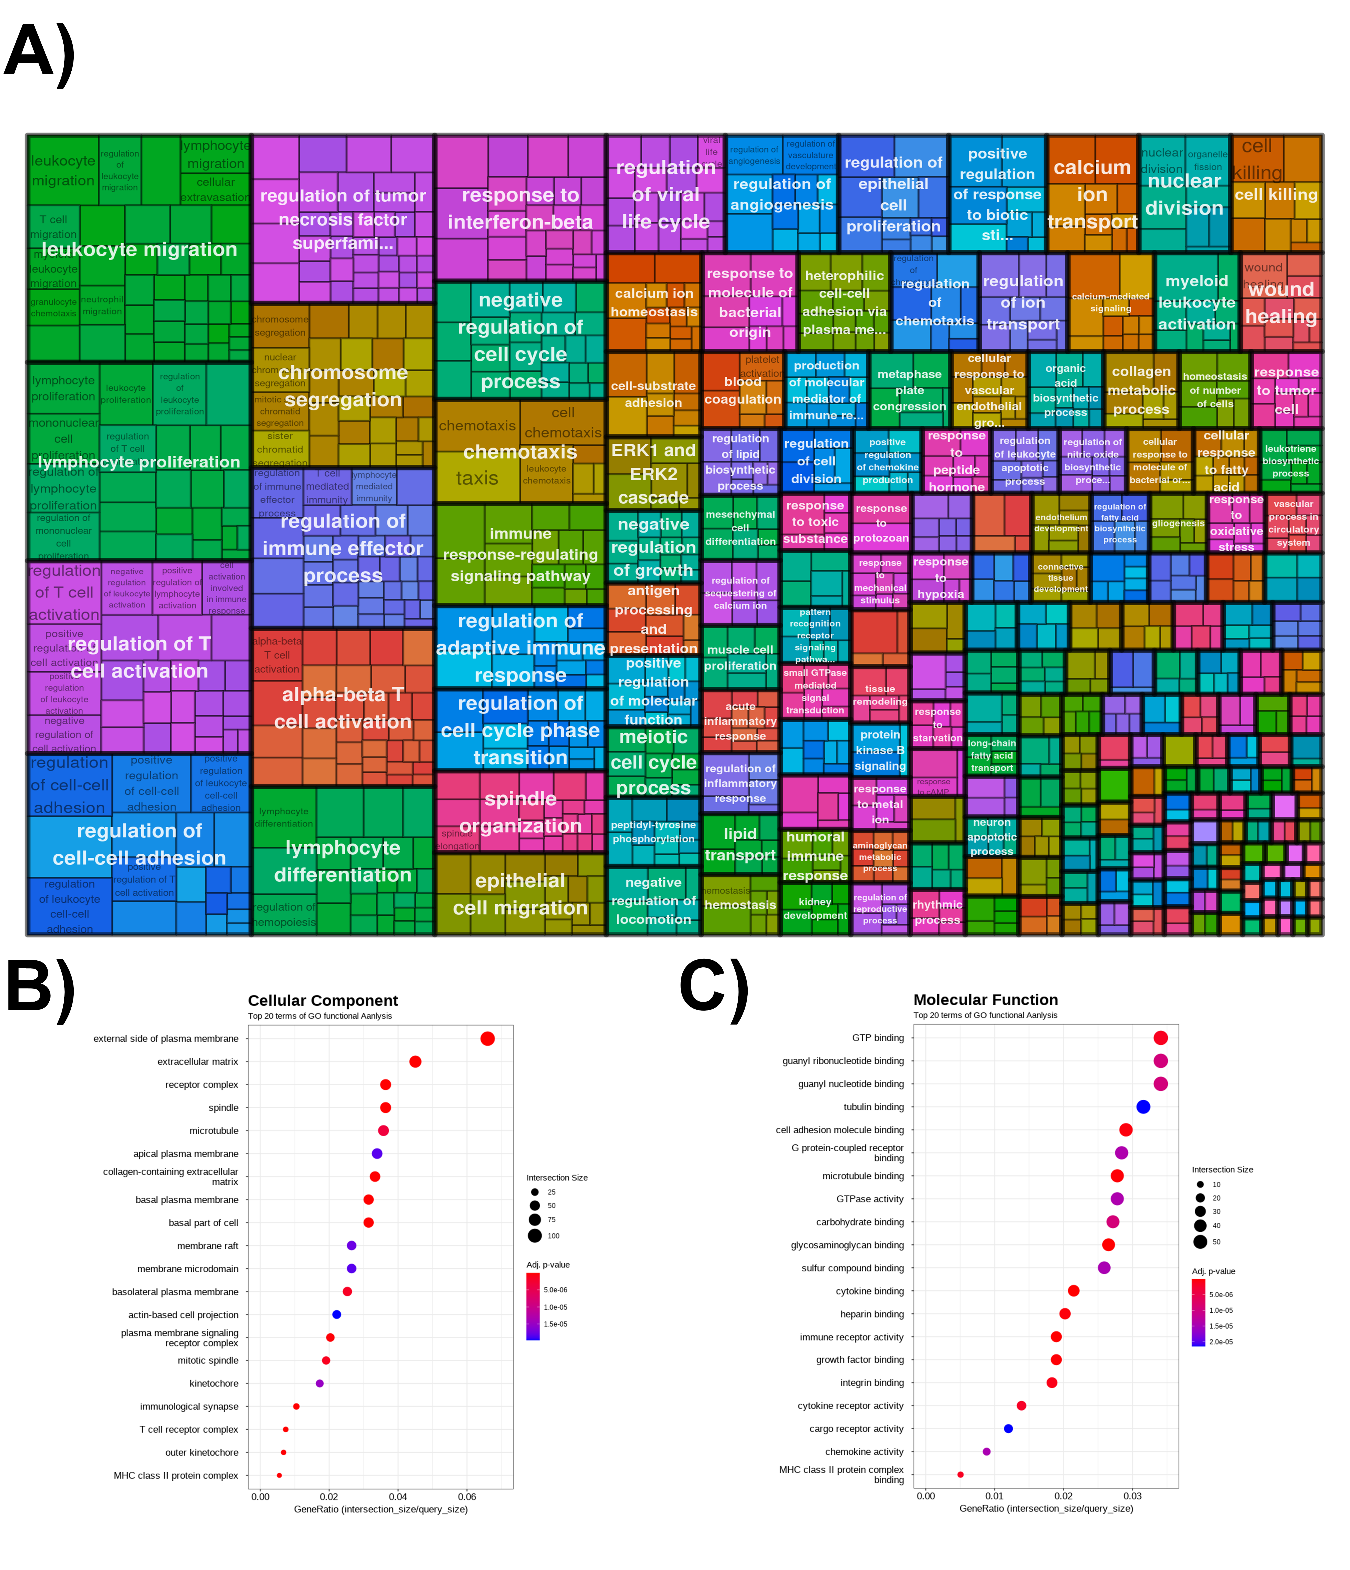


**Supplementary Figure 5. Gene ontology analysis of ascitic fluid cells from PEP37-immunized mice.** **A)** Treemap plot. Treemaps are space-filling visualizations of hierarchical structures. The terms are grouped (colored) based on their parent, and the space used by the term is proportional to the score. **B)** Top 20 terms from the GO functional analysis of the CC category. **C)** Top 20 terms of GO functional analysis from the molecular function category.
